# Supplementary material
Source: PubMed Central journal article supplement (PMC8408610)
Supplement: EMBJ-40-e106320-s002.pdf [file EMBJ-40-e106320-s002.pdf]

# **Gut Inflammation in Alzheimer's Disease Regulates A $\beta$ and Tau Fibril Propagation from Gut into the Brain via a C/EBP $\beta$ / $\delta$ -secretase Pathway**

By

Chun Chen<sup>1</sup>, Yunzhe Zhou<sup>2</sup>, Hualong Wang<sup>1,4</sup>, Ashfaquul Alam<sup>3</sup>, Seong Su Kang<sup>1</sup>, Eun Hee Ahn<sup>1</sup>, Xia Liu<sup>1</sup>, Jianping Jia<sup>2</sup> and Keqiang Ye<sup>1,\*</sup>

<sup>1</sup>Department of Pathology and Laboratory Medicine

Emory University School of Medicine

Atlanta, GA 30322, USA

<sup>2</sup>Innovation Center for Neurological Disorders,

Department of Neurology, Xuanwu Hospital,

Capital Medical University, Beijing, P. R. China

<sup>3</sup>Microbiology, Immunology & Molecular Genetics

University of Kentucky

800 Rose Street, Lexington, KY 40536, USA

<sup>4</sup>Department of Neurology, The First Hospital of Hebei Medical University,

Shijiazhuang, Hebei 050031, P. R. China.

\*To whom all correspondence should be addressed (E-mail: [kye@emory.edu](mailto:kye@emory.edu))

**Running Title:** Gut inflammation initiates AD Pathology spreading via the vagus nerve

**Keywords:** fibrils; inflammation; Alzheimer's disease; C/EBP $\beta$ ;  $\delta$ -secretase

## **Table of Content**

Legends to supplementary figures - page 2 to page 5

Fig.S1-Fig.S7 -page 6 to page 12

## Legends to Supplementary figures

### Appendix Figure S1. C/EBP $\beta/\delta$ -secretase pathway is escalated in an age-dependent manner in 3xTg mice brain.

(A) Immunoblot showing p-C/EBP  $\beta$ , C/EBP  $\beta$ , AEP, APP, and Tau expression and processing in mouse brain. (B) AEP activity assay in brain lysate from age-dependent 3xTg mice. Data represent the mean  $\pm$  SEM; representative data of three samples; \*P =0.0128 (\*P < 0.05), \*\*P =0.0066 (\*\*P < 0.01), \*\*P =0.0018 (\*\*P < 0.01) compared with control, one-way ANOVA.

### Appendix Figure S2. Chronic DSS treatment induces colonic inflammation activating C/EBP $\beta/\delta$ -secretase pathway in WT mice.

(A) Immunoblot showing p-C/EBP  $\beta$ , C/EBP  $\beta$ , MPO, AEP, APP, and Tau expression and proteolytic processing in WT mouse **colon**. (B) Immunoblot showing p-C/EBP  $\beta$ , C/EBP  $\beta$ , AEP, APP, and Tau expression and processing in WT mouse brain. (C) Immunoblot showing p-C/EBP  $\beta$ , C/EBP  $\beta$ , MPO, AEP, APP, and Tau expression and proteolytic processing in 3xTg mouse **colon**. (D) Immunoblot showing p-C/EBP  $\beta$ , C/EBP  $\beta$ , AEP, APP, and Tau expression and proteolytic processing in 3xTg mouse brain. (E) AEP activity assay in **colon** lysates and brain lysates of vehicle-treated or DSS-treated WT mice. Representative data of three samples; \*P=0.0121, \*P=0.0172 (\*P < 0.05) compared with control **colon** and brain, multiple unpair t test. (F) AEP activity assay with **colon** lysates and brain lysates of vehicle-treated or DSS-treated 3xTg mice. Representative data of three samples; \*\*\*P=0.0004 (\*\*\*P < 0.001), \*\*P=0.0024 (\*\*P < 0.01) compared with control **colon** and brain, multiple unpair t test. (G) Pro-inflammatory cytokines IL1- $\beta$ , IL-6, and TNF $\alpha$  concentrations in **colon** lysates and brain lysates of vehicle-treated 3xTg mice, DSS-treated 3xTg and DSS-treated WT mice, respectively. Representative data of three samples; \*\*\*\*P<0.0001, \*P=0.0104 (\*P<0.05) compared with control, two-way ANOVA. (H)Immunofluorescent staining of A $\beta$  (green) in hippocampus CA1 region and cerebral cortex of Vehicle-treated WT and 3xTg mice or DSS-treated WT and 3xTg mice. (I) Quantitative analysis of A $\beta$  positive cells. The density of A $\beta$  positive cells was significantly increased by DSS treatment in 3xTg mice. Representative data of five samples, data are shown as mean  $\pm$  SEM. \*\*P=0.0043 (\*\*P < 0.01), \*\*\*\*P < 0.0001, one-way ANOVA. (J) Immunofluorescent staining of AEP (green), A $\beta$  (green) and AT8 (green) in colons of vehicle-treated 3xTg mice, DSS-treated 3xTg and DSS-treated WT mice, respectively. (K) Quantitative

analysis of AEP, A $\beta$  and AT8 positive cells. The density of AEP, A $\beta$  and AT8 positive cells was significantly increased by DSS treatment in 3xTg mice. Representative data of five samples, data are shown as mean  $\pm$  SEM. \*\*\*\*P < 0.0001, one-way ANOVA.

### **Appendix Figure S3. DSS-induced Tau pathology in 3xTg mice colon is alleviated through knocking out C/EBP $\beta$ / $\delta$ -secretase or vagotomy.**

(A) Immunofluorescent staining of T22 (red) and Tau 5 (green) in colons from vehicle-treated, DSS-treated and pre-vagotomy DSS-treated mice. Cytofluorograms describe the distribution of red and green pixels from respective channels of images. Pearson's correlation coefficient was applied for colocalization analysis. (B) Quantitative analysis of number of colocalization signals per visual area. Representative data of three samples, data are shown as mean  $\pm$  SEM. \*P=0.0106, \*P=0.0205 (\*P < 0.05), \*\*P=0.0093(\*\*P < 0.01), \*P=0.0236 (\*P < 0.05), one-way ANOVA. (C) Immunofluorescent staining of T22 (red) and AT8 (green) in colons from vehicle-treated, DSS-treated and pre-vagotomy DSS-treated mice. (D) Quantitative analysis of T22 positive cells. The density of T22 positive cells was significantly increased by DSS treatment and decreased through knocking out C/EBP  $\beta$ /AEP or vagotomy. Representative data of three samples, data are shown as mean  $\pm$  SEM. \*\*\*P=0.0003, \*\*\*P=0.0004, (\*\*\*P<0.001), \*\*\*\*P<0.0001, one-way ANOVA. (E) Quantitative analysis of AT8 positive cells. The density of AT8 positive cells was significantly increased by DSS treatment and decreased through knocking out C/EBP  $\beta$ /AEP or vagotomy. Representative data of three samples, data are shown as mean  $\pm$  SEM. \*\*\*\*P < 0.0001, one-way ANOVA.

### **Appendix Figure S4. Vagotomy blunts C/EBP $\beta$ / $\delta$ -secretase signaling pathway in WT mice induced by chronic DSS treatment**

(A) Immunoblot showing p-C/EBP  $\beta$ , C/EBP  $\beta$ , AEP, APP and Tau expression and proteolytic processing in brain lysates of different brain hemispheres from pre-vagotomy DSS treated WT mice. (B) AEP activity assay with brain lysates of different brain hemispheres from pre-vagotomy DSS treated WT mice. Data represent the mean  $\pm$  SEM; representative data of three samples. \*\*P=0.0078 (\*\*< 0.01), unpaired t tests. (C&D) Cued and Contextual Fear-conditioning tests. Data represent the mean  $\pm$  SEM of n = 8 mice per group; \*\*\*P =0.0003 (\*\*\*P < 0.001), two-way ANOVA; \*\*\*P=0.0008 (\*\*\*P < 0.001), unpaired t tests.

### **Appendix Figure S5. Characterization and verification of protein materials for colonic injection**

(A) MALDI-ToF mass spectra data for the recombinant A $\beta$ 1-42 peptide purchased from the rpeptide® company. This quality control data shows no additional contamination visible in the batch that have been used within the experiments. (B) Thioflavin T binding assay. Aggregation kinetics experiments in the presence of different A $\beta$  PFFs concentrations showed that A $\beta$  PFFs had little effect on aggregation at concentration of 20 nM or below. (C) TEM image of Tau N368 PFFs. Scale bar: 50 nm. (D) Illustration of colonoscopy injection endoscopy. (E) Demonstration of the vagus nerve dissection. (F) SDS-PAGE following immunoblotting of A $\beta$  fibrils, AD brain extracts and 5xFAD brain extracts (Hank's soluble fraction) with A $\beta$  antibody; Coomassie blue staining SDS-PAGE gel (18%). (G) A $\beta$ 40 and A $\beta$ 42 concentrations in both AD brain extracts and 5xFAD brain extracts (Hank's soluble fraction) were measured using human A $\beta$ 40 and human A $\beta$ 42 ELISA kit. (H) SDS-PAGE following immunoblotting of AD brain extracts and 5xFAD brain extracts (Hank's soluble fraction) with human Tau antibody (HT7), cleaved Tau N368 antibody and phosphorylated Tau antibody (AT8).

### **Appendix Figure S6. Vagotomy blunts AD pathologies in 3xTg mice induced by colonic inoculated AD brain extracts**

(A) Immunoblot showing p-C/EBP  $\beta$ , C/EBP  $\beta$ , APP and Tau expression and proteolytic processing in brain lysates of different brain hemispheres from pre-vagotomy colonic-injected AD brain extracts 3xTg mice. (B) AEP activity assay with brain lysates of different brain hemispheres from pre-vagotomy colonic-injected AD brain extracts 3xTg mice. Data represent the mean  $\pm$  SEM; representative data of three samples, two-way ANOVA. (C) A $\beta$ 42 concentration in brain lysates prepared from cell lysis buffer (soluble) and Guanidine-HCl buffer (total) were measured using human A $\beta$ 42 ELISA kit. Triton X-100 soluble A $\beta$ 42 concentration in mice brain increased 4 months after colonic inoculation with AD brain extracts. However, pre-vagotomy diminished the escalation. Data represent the mean  $\pm$  SEM; representative data of three samples; \*\*P=0.0034 (\*\*P < 0.01) compared with control, two-way ANOVA.

### **Appendix Figure S7. Colonic-injection of AD brain extracts increases oligomeric Tau and neuronal cell death in mice brain.**

(A) Immunofluorescent co-staining of cleaved Tau N368 (red) and AT8 (green) **in CA1 region from hippocampus of brains** from colonic-injected PBS, colonic-injected AD brain extracts, and pre-Vagotomy colonic injected AD brain extracts 3xTg mice. (B) Quantitative analysis of cleaved Tau N368 positive cells and AT8 positive cells, respectively. Data are shown as mean  $\pm$  SEM, representative data of three samples. The density of both cleaved Tau N368 positive cells and AT8 positive cells were significantly increased by colonic-injection of AD brain extracts and decreased through vagotomy before colonic-injection. **\*P=0.0289(\*P<0.05), \*\*\*\*P<0.0001; \*\*P=0.0045(\*\*P<0.01), \*P=0.0103 (\*P<0.05), \*\*\*P=0.002 (\*\*P<0.001), one-way ANOVA.**

(C) Immunofluorescent staining of cleaved Caspase 3 (red) and NeuN (green) **in cerebral cortex of brains** from colonic-injected PBS, colonic-injected AD brain extracts, and pre-Vagotomy colonic injected AD brain extracts 3xTg mice. (D) Quantitative analysis of cleaved-Caspase 3 and NeuN positive cells, respectively. Data are shown as mean  $\pm$  SEM, representative data of three samples. The density of cleaved-Caspase 3 positive cells was significantly increased by colonic injection of AD brain extracts and decreased through vagotomy before colonic-injection, **\*\*\*\*P < 0.0001, \*\*\*P=0.0004 (\*\*\*P<0.001), one-way ANOVA;** NeuN positive cells was significantly decreased by colonic-injection of AD brain extracts and increased through vagotomy before colonic-injection, **\*\*\*\*P < 0.000, \*\*P=0.004 (\*\*P<0.01), one-way ANOVA.**

## Appendix Supplementary Figures

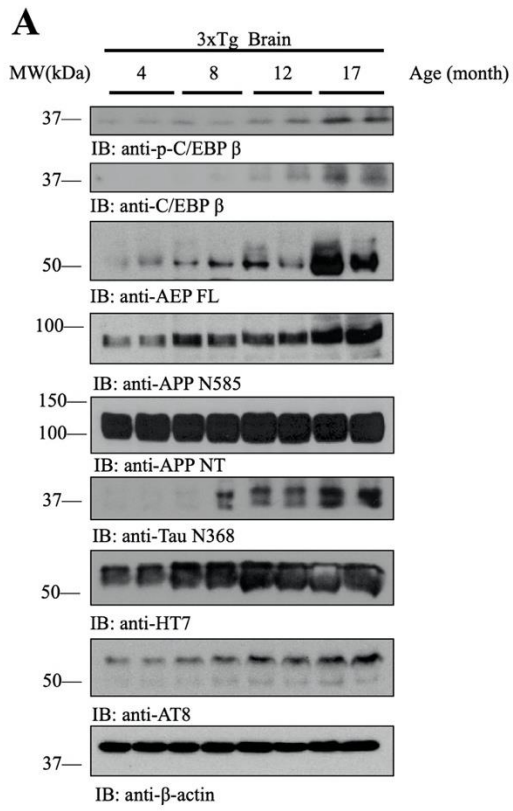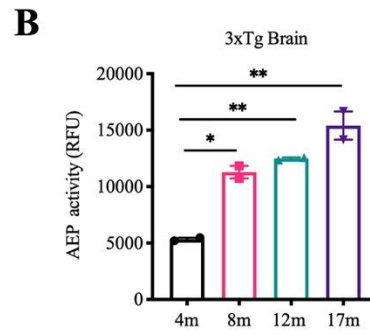

Figure S1

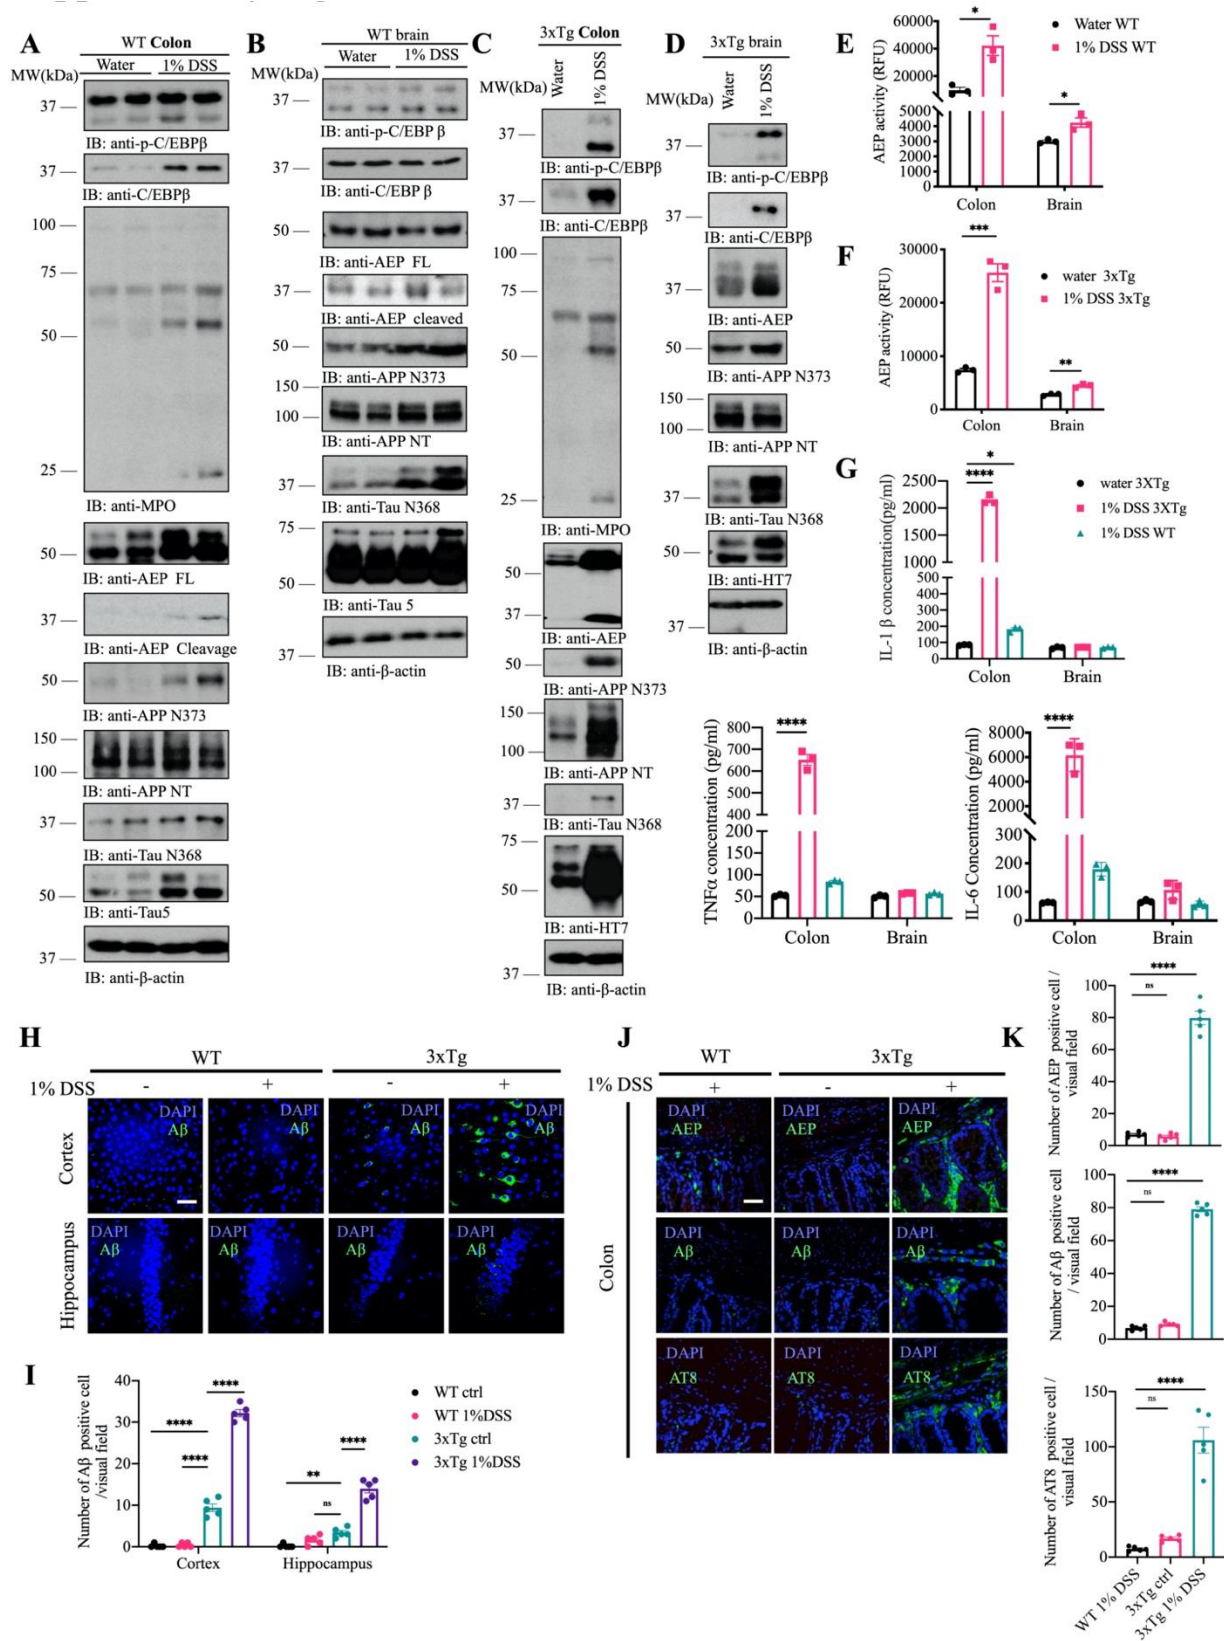

Figure S2

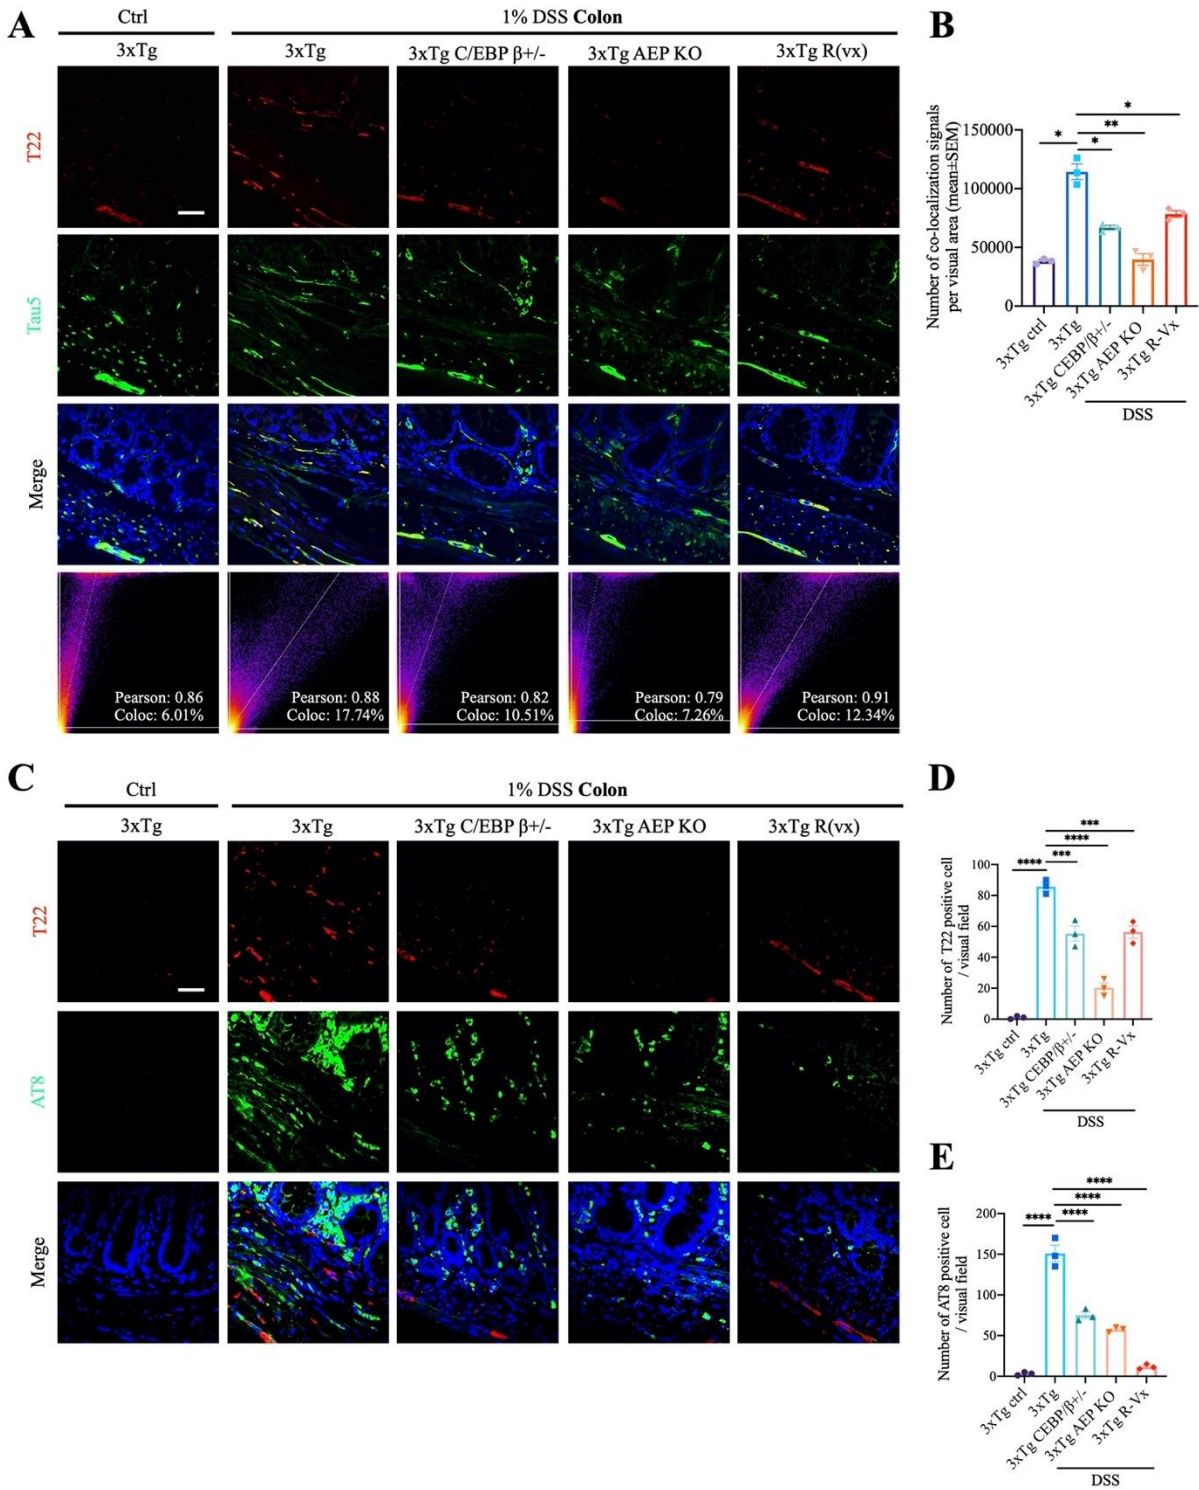

**Figure S3**



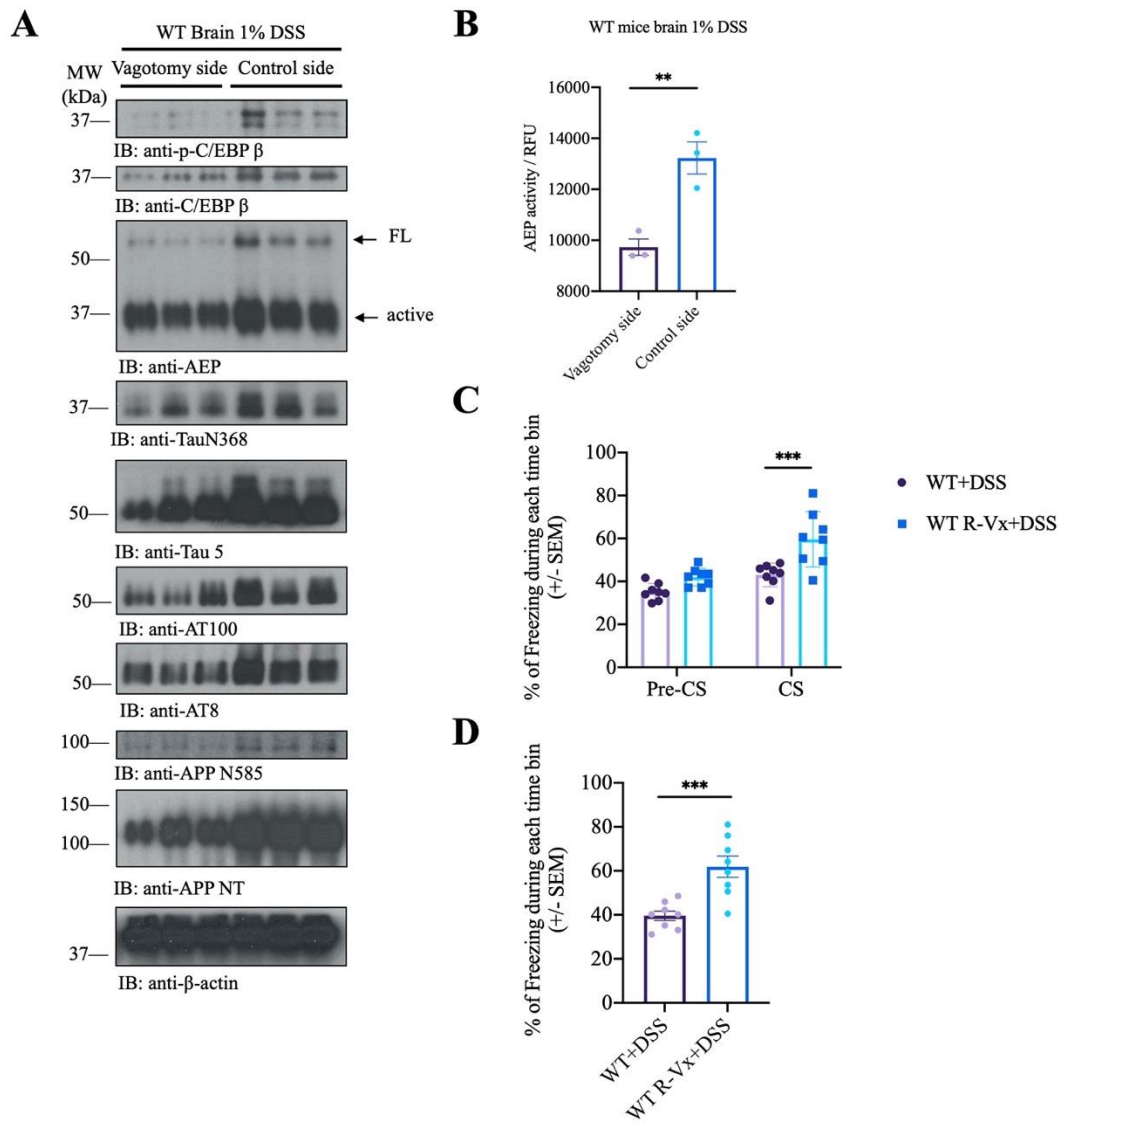

Figure S4

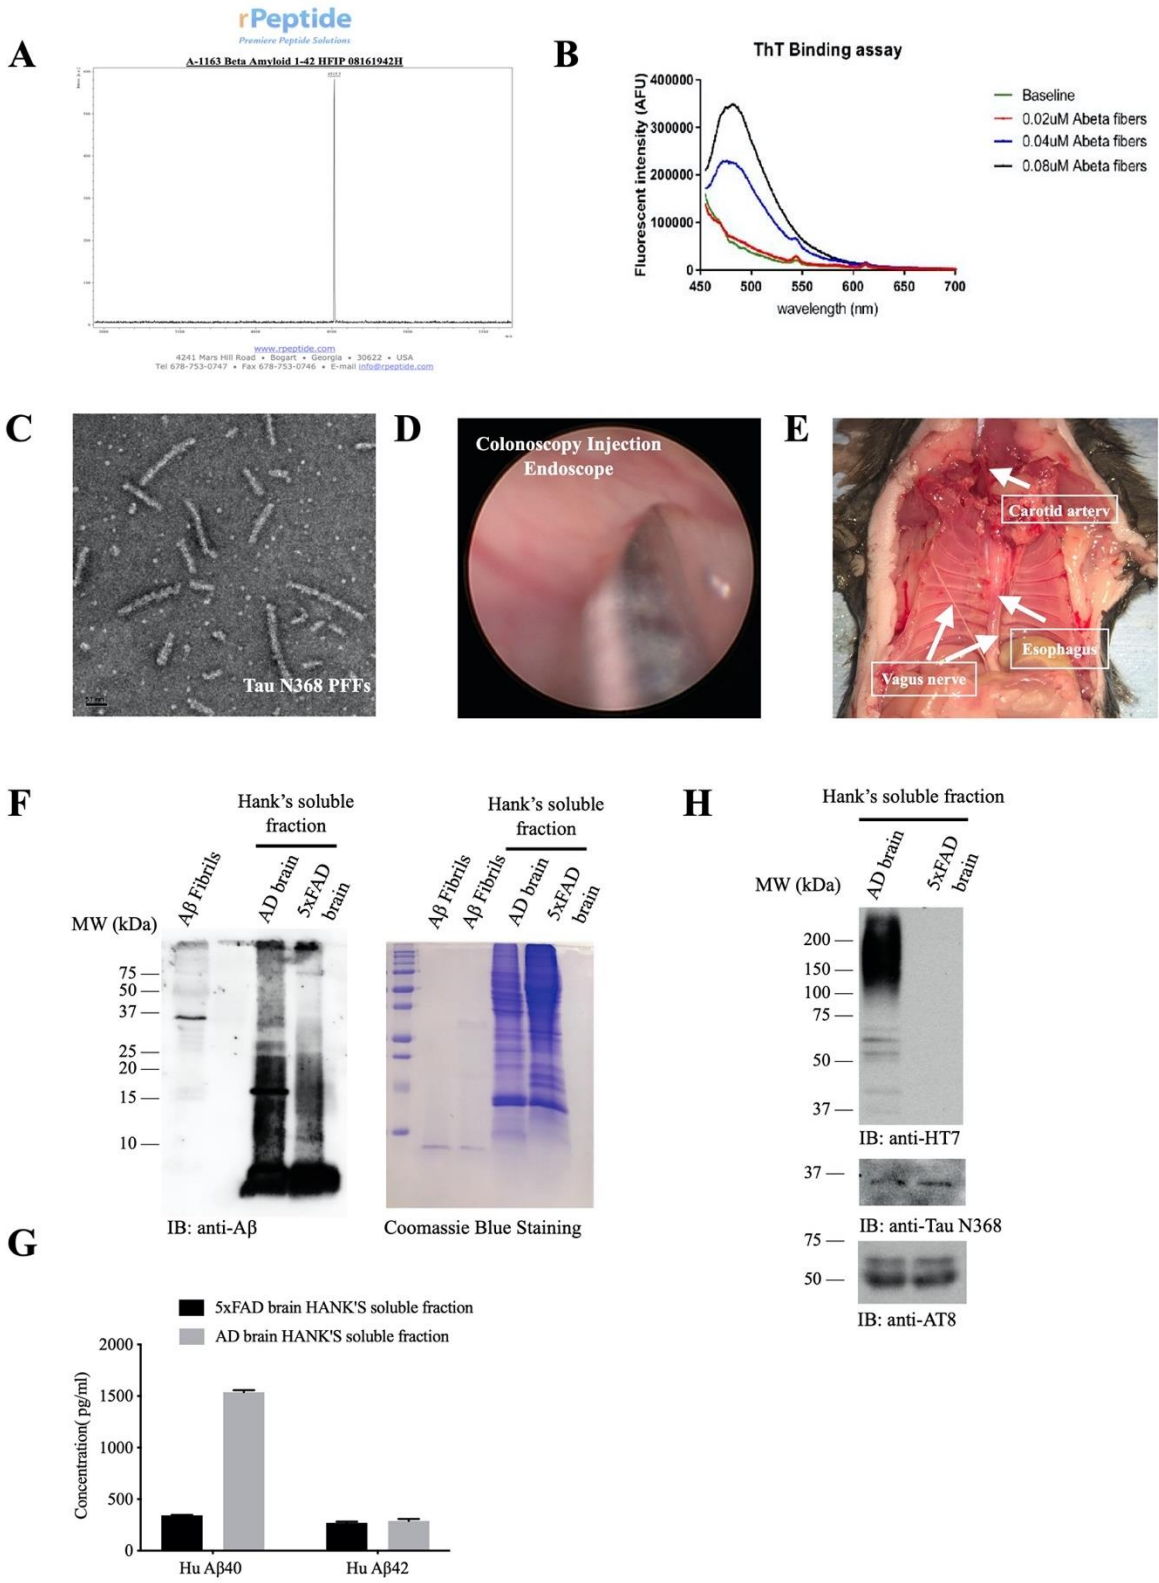

**Figure S5**

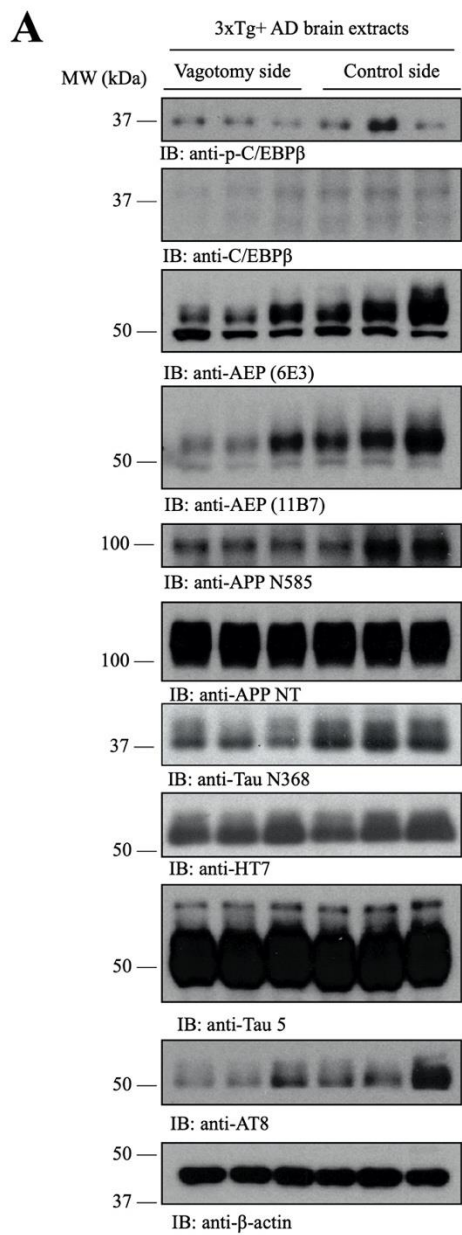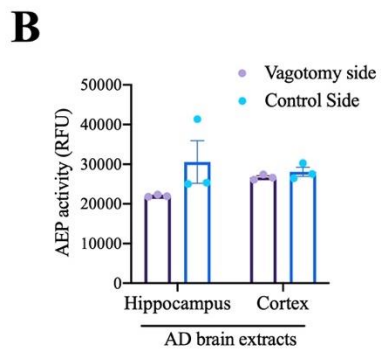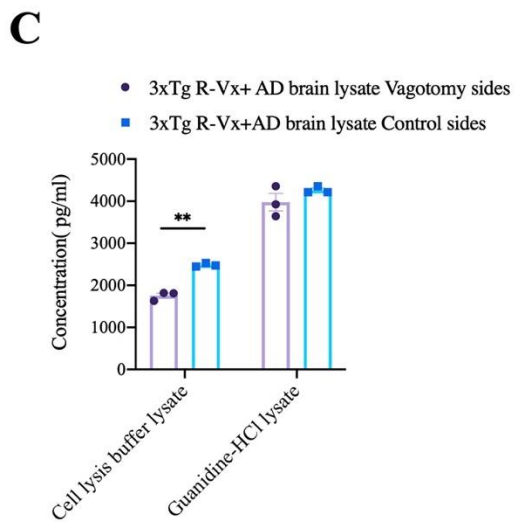

**Figure S6**

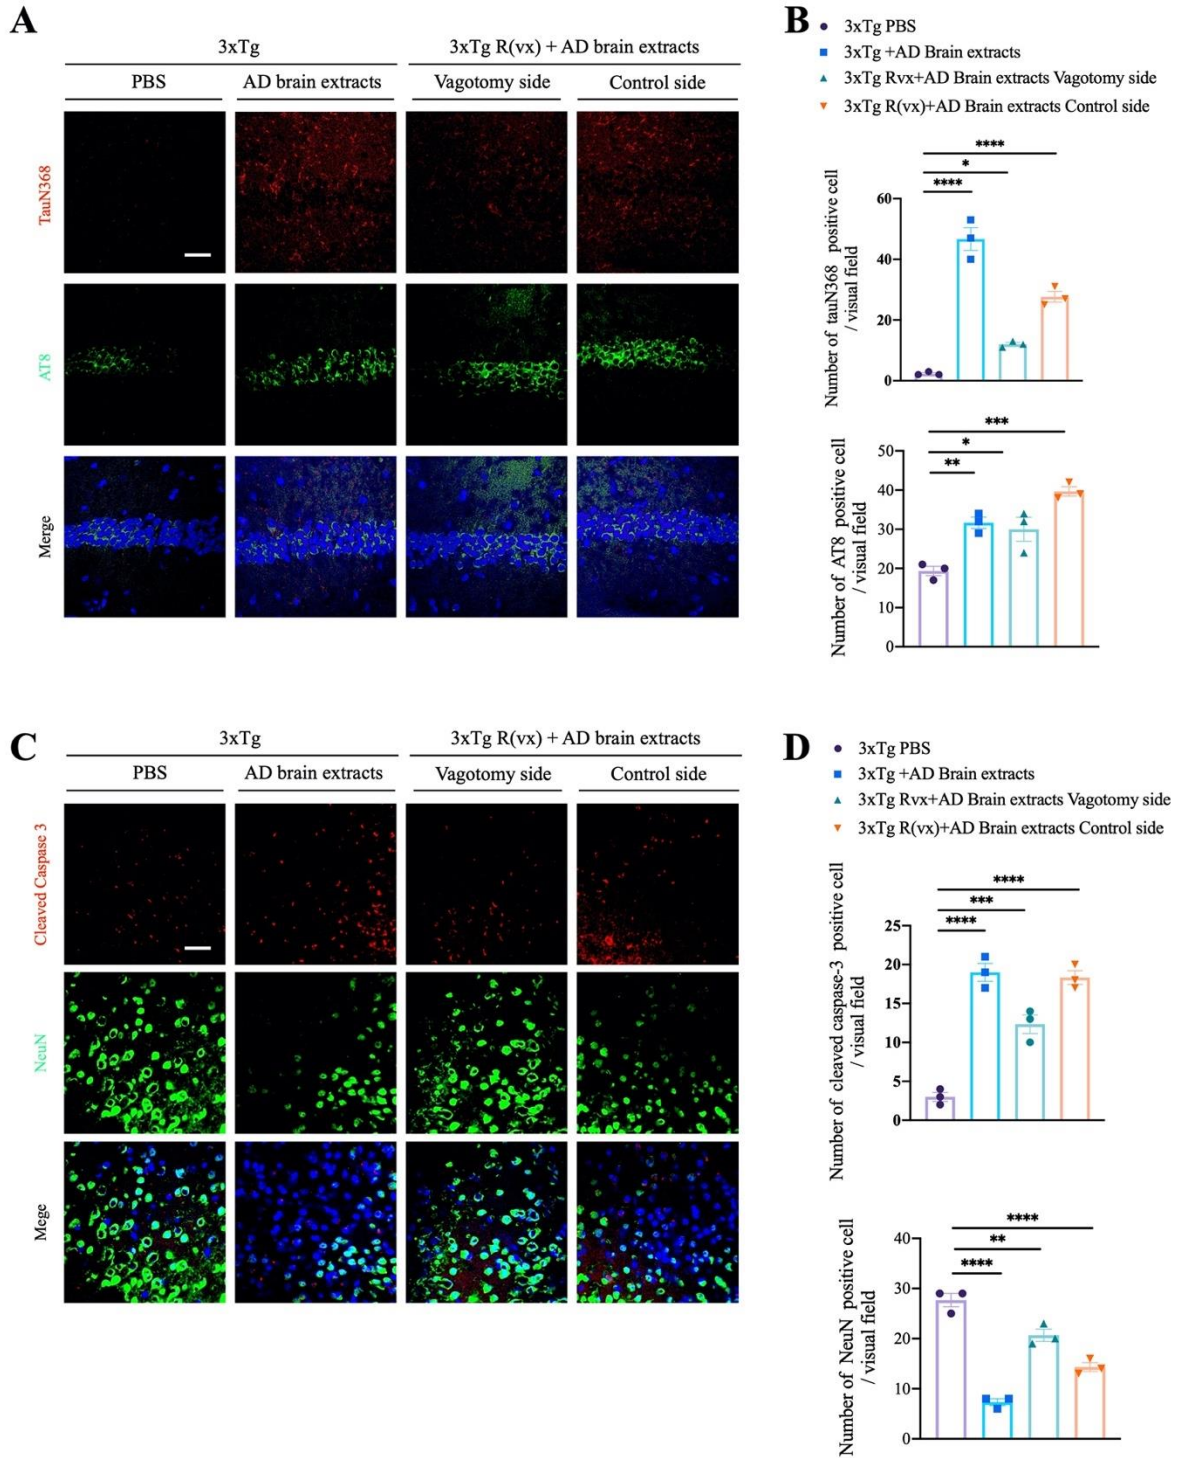

Figure S7
