# Supplementary material
Source: PubMed Central journal article supplement (PMC8408610)
Supplement: EMBJ-40-e106320-s005.pdf [file EMBJ-40-e106320-s005.pdf]

**Fig 4A**

| 1% DSS      | 3xTg Colon |   |   |   |
|-------------|------------|---|---|---|
|             | -          | - | + | + |
| Single side | -          | - | + | + |
| Vagotomy    | -          | - | + | + |

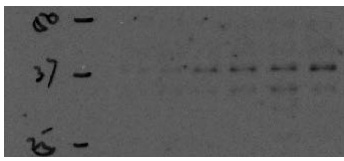

IB: anti-p-C/EBPβ

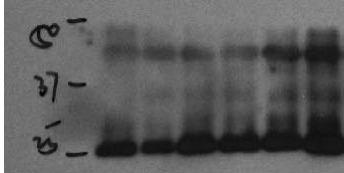

IB: anti-C/EBPβ

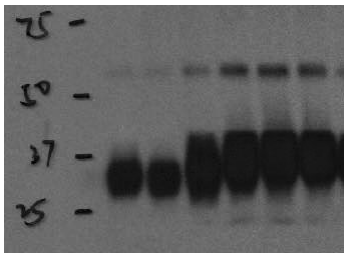

IB: anti-AEP

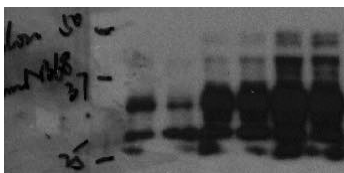

IB: anti-TauN368

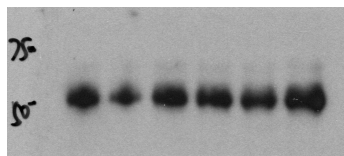

IB: anti-Tau5

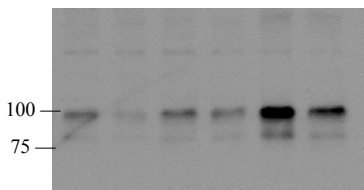

IB: anti-APPN585

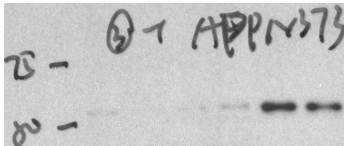

IB: anti-APPN373

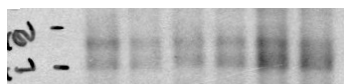

IB: anti-APPNT

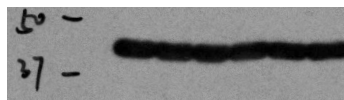

IB: anti-β-actin

**Fig 4B**

| 3xTg Brain 1% DSS |              |
|-------------------|--------------|
| Vagotomy side     | Control side |

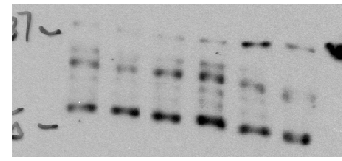

IB: anti-p-C/EBPβ

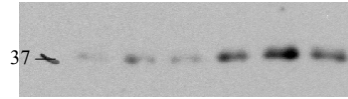

IB: anti-C/EBPβ

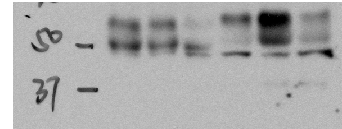

IB: anti-AEP FL (short time exposure)

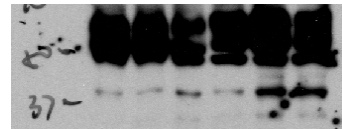

IB: anti-AEP active (long time exposure)

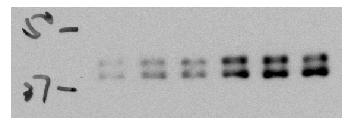

IB: anti-TauN368

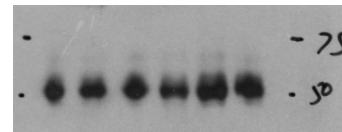

IB: anti-Tau5

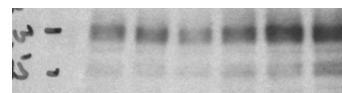

IB: anti-APPN585

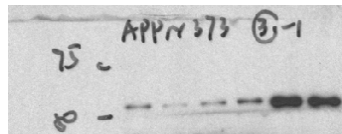

IB: anti-APPN373

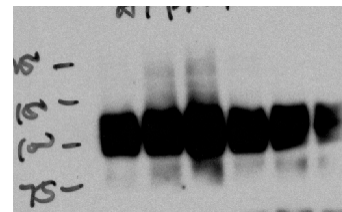

IB: anti-APPNT

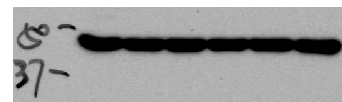

IB: anti-β-actin
