# Supplementary material
Source: PubMed Central journal article supplement (PMC8408610)

**Fig 2A**

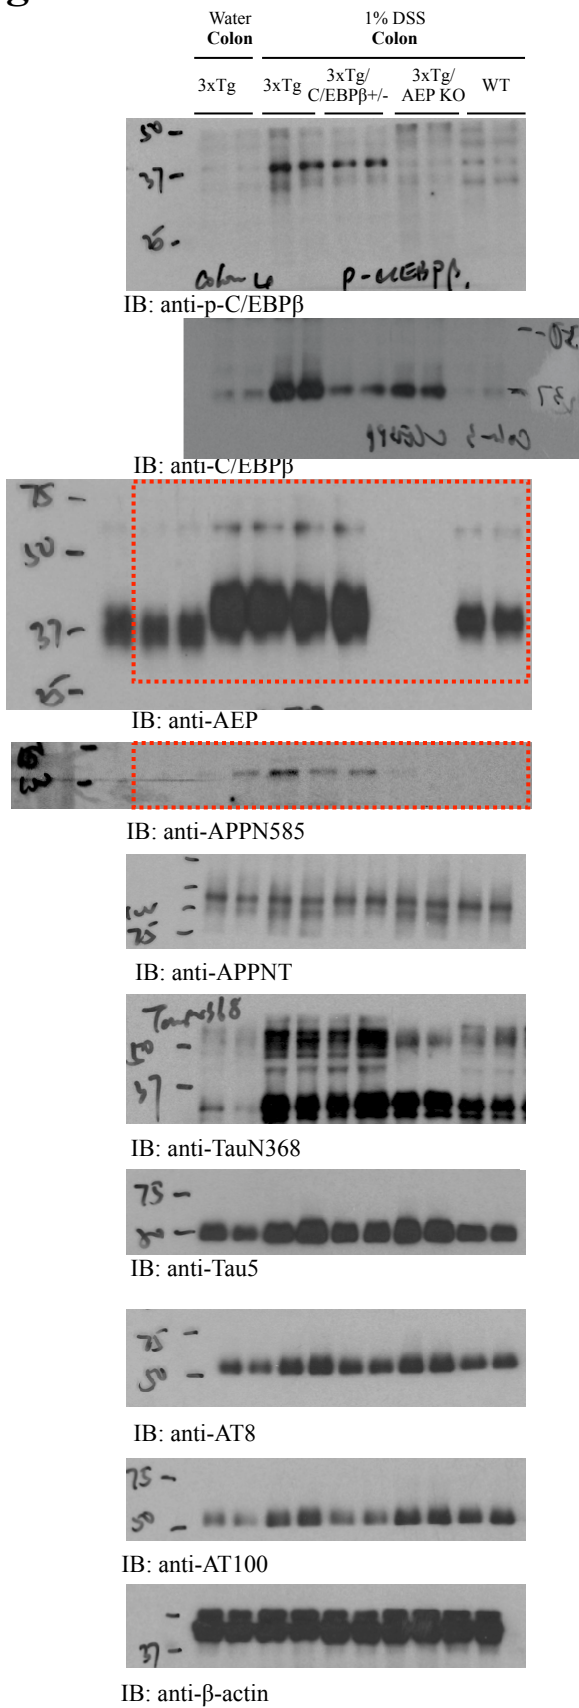

**Fig 2B**

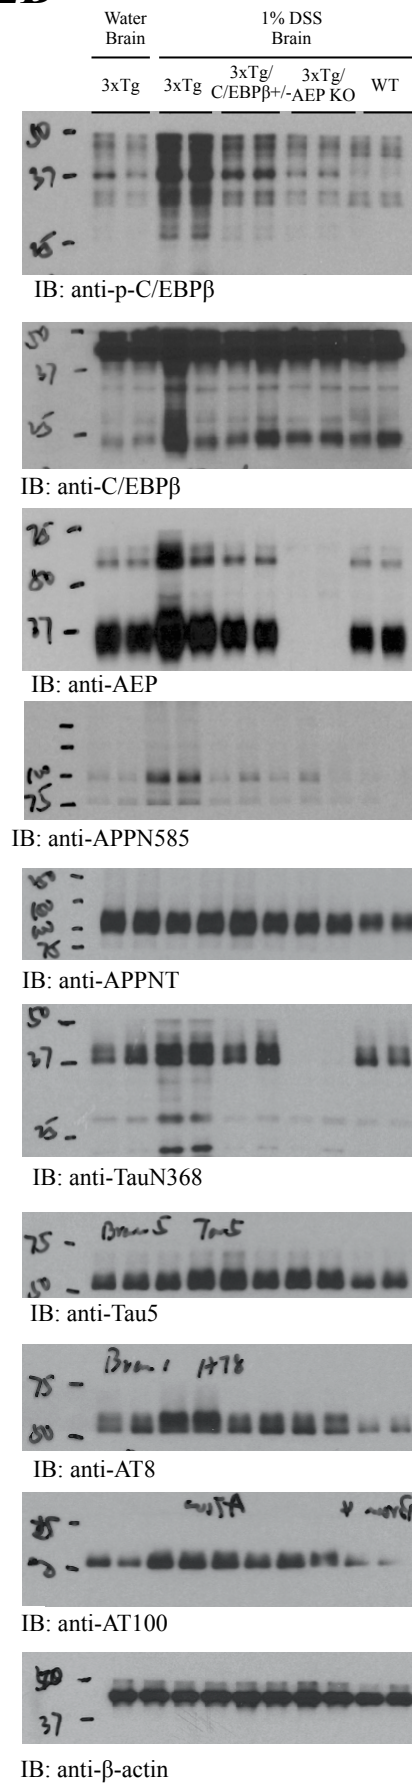

Supplement: EMBJ-40-e106320-s006.pdf [file EMBJ-40-e106320-s006.pdf]
